# Supplementary material for: Shine and darkle the blood vessels: Multiparameter hypersensitive MR angiography for diagnosis of panvascular diseases
Source: PubMed Central journal article supplement — Sci Adv. 2024 Oct 4;10(40):eadq4082. doi: 10.1126/sciadv.adq4082 (PMC11451532; doi:10.1126/sciadv.adq4082), 2024-10-04
Supplement: sciadv.adq4082_sm.pdf [file sciadv.adq4082_sm.pdf]

Supplementary Materials for  
**Shine and darkle the blood vessels: Multiparameter hypersensitive MR  
angiography for diagnosis of panvascular diseases**

Wenyue Li *et al.*

Corresponding author: Yi Hou, houyi@iccas.ac.cn; Meng Qin, qinmeng212@scu.edu.cn;  
Peisen Zhang, zhangps@iccas.ac.cn

*Sci. Adv.* **10**, eadq4082 (2024)  
DOI: 10.1126/sciadv.adq4082

**The PDF file includes:**

Supplementary Text  
Supplementary Materials and Methods  
Figs. S1 to S20  
Legends for movies S1 to S9

**Other Supplementary Material for this manuscript includes the following:**

Movies S1 to S9

## Supplementary Text

### Synthesis and characterization of PEGylated NaGdF<sub>4</sub> nanoparticles

The biocompatible NaGdF<sub>4</sub> nanoparticles with appropriate physical parameters were synthesized. In detail, the oleate-capped NaGdF<sub>4</sub> nanoparticles with an ultrasmall diameter of  $3.53 \pm 0.49$  nm were firstly prepared by high temperature thermal decomposition, as shown in the transmission electron microscopy (TEM) image together with corresponding size distribution profile in fig. S1. The selected area electron diffraction measurement was conducted and as shown in fig. S2, NaGdF<sub>4</sub> nanoparticles are in hexagonal structure according to the JCPDS cards (No. 27-0699). In addition, the hexagonal phases of NaGdF<sub>4</sub> nanoparticles were further investigated using the high-resolution TEM (HRTEM) shown in fig. S1, where the lattice spacing of (101) and (200) planes match well with those of corresponding bulk materials. To endow the nanoparticles with biocompatibility, poly (ethylene glycol) (PEG), most of which received FDA approval and were widely used in clinical practice, was selected to modify the surface of the nanoparticles. The asymmetric poly (ethylene glycol) (PEG) ligands were applied to replace the oleate ligand, ultimately obtaining the biocompatible PEGylated NaGdF<sub>4</sub> nanoparticles. As displayed in Fig. 1C and fig. S3, the resultant PEGylated NaGdF<sub>4</sub> nanoparticles were successfully synthesized with the diameter of  $3.77 \pm 0.46$  nm, suggesting that the procedure of ligand exchange did not lead to evident size changes of the NaGdF<sub>4</sub> nanoparticles. The dispersity of nanoparticles was tested through dynamic light scattering (DLS) analysis. As given in fig. S4, the average hydrodynamic diameter ( $D_h$ ) of PEGylated NaGdF<sub>4</sub> nanoparticles was 15.13 nm with a relatively narrow size distribution, suggesting that the water monodispersity of nanoparticles is satisfactory.

## Materials and Methods

### Materials

Gadolinium chloride hexahydrate (GdCl<sub>3</sub>·6H<sub>2</sub>O), oleic acid (OA), 1-octadecene (ODE), and ammonium fluoride (NH<sub>4</sub>F) were purchased from Sigma-Aldrich, cyclohexane was purchased from Damao Chemical Reagent Co., Ltd., and methanol, anhydrous ethanol, tetrahydrofuran (THF) with analytical grade were purchased from Sinopharm Chemical Reagent Beijing, Co., Ltd. Sodium hydroxide (NaOH) was obtained from Beijing Chemical Reagents Co. Ltd. The asymmetric poly (ethylene glycol) (PEG) of molecular weight 2000 was supplied from Beijing Oneder Hightech Co. Ltd. Human umbilical vein endothelial cells (HUVECs) were purchased from American Type Culture Collection (ATCC).

### <sup>68</sup>Ga Labeling of nanoparticles

<sup>68</sup>Ge/<sup>68</sup>Ga generator was eluted with 0.05M HCl solution. The pH of the eluted <sup>68</sup>GaCl<sub>3</sub> solution was adjusted at 4.5 by the addition of NaOAc solution. During labeling, 111 MBq of <sup>68</sup>GaCl<sub>3</sub> was added to a clean tube with PEGylated NaGdF<sub>4</sub> solution (600 μg of nanoparticles included) and the mixture was heated at 37 °C for 20 min. The radiolabeling efficiency was controlled by thin-layer chromatography on TLC Silica gel (TLC-SG) with a methanol and ammonium acetate solvent (volume ratio of 1:1). Excess <sup>68</sup>GaCl<sub>3</sub> was removed by ultrafiltration with 30 kDa MWCO centrifugal filter (Millipore YM-50). The resultant nanoparticles were configured by PBS with the Gd<sup>3+</sup> concentration of 3 mg/mL.

## Characterizations of the NaGdF<sub>4</sub> nanoparticles

Transmission electron microscope (TEM) images of the NaGdF<sub>4</sub> nanoparticles were obtained on a JEM-2100 transmission electron microscope at an acceleration voltage of 200 kV. The core sizes of NaGdF<sub>4</sub> nanoparticles were measured by averaging at least 100 nanoparticles per sample in corresponding TEM image. Dynamic light scattering (DLS) was carried out at 298 K with Nano ZS (Malvern) equipped with a solid state He-Ne laser ( $\lambda = 632.8$  nm).

## Methods

### Cell culture

Human umbilical vein endothelial cells (HUVECs, ATCC CRL 1730) were cultured in Endothelial Cell Medium (ECM) with 5% fetal bovine serum (FBS), 1% endothelial cell growth factor (ECGF), and 1% penicillin/streptomycin solution at 37 °C under 5% CO<sub>2</sub> atmosphere. The cell line was tested negative for mycoplasma contamination by the mycoplasma detection kit (Yeasen Cat. No. 40611).

### Cell viability assays

Cell Counting Kit-8 (CCK-8) assay on HUVECs was carried out as follows. HUVECs were seeded into a 96-well cell culture plate with a density of 5,000 cells per well under 100% humidity, and then cultured at 37 °C in an atmosphere containing 5% CO<sub>2</sub> for 24 h. Then, the NaGdF<sub>4</sub> nanoparticles with different concentrations were added into the wells and incubated with the cells for 24 h at 37 °C under 5% CO<sub>2</sub>. After the supernatant containing the excreted NaGdF<sub>4</sub> nanoparticles agent was decanted, the cells were incubated for another 48 h. After that, 10  $\mu$ L CCK-8 was added to each well, and incubated for 4 h at 37 °C under 5% CO<sub>2</sub>. The optical density of each well at 450 nm was recorded on a microplate reader (Thermo, MULTISKAN GO).

### Hemolysis test

Briefly, 2 mL blood sample was mixed with 6 mL of normal saline (NS) to purify through the centrifugation for several times. The resultant red blood cells were diluted in 4 mL of NS and the suspension was then diluted 1: 4 into NS (negative control); water (positive control); NaGdF<sub>4</sub> solutions (in NS) at different concentrations. The samples were kept in the dark for 4 h at 37 °C and then centrifuged at 3000 rpm for 5 min. After centrifuging, the supernatant was transferred to a 96-well plate and the absorbance at 541 nm was recorded.

The hemolysis rate was calculated by the following equation:

$$\text{Hemolysis rate} = \frac{D_t - D_{nc}}{D_{pc} - D_{nc}} \times 100\%$$

where  $D_t$ ,  $D_{nc}$ , and  $D_{pc}$  were the absorbance of the tested sample, the negative control, and the positive control, respectively.

### Establishment of rodent models

#### *Rat model of right middle cerebral artery occlusion (rMCAO)*

The Sprague-Dawley (SD) rats (~300 g) were randomly selected to be in abrosia for 12 h besides water. Abdominal anesthesia was conducted with 1% pentobarbital. During surgery, the rectal

temperature was monitored and kept at  $37 \pm 0.5$  °C by using a heating blanket. A midline incision between the sternum and chin was operated to expose the carotid arteries and an MCAO suture (total length of ~45 mm and diameter of  $0.38 \pm 0.02$  mm) with a slightly enlarged silicon-coated tip was inserted via external carotid artery into internal carotid artery and pushed ~18-20 mm from the carotid bifurcation for building the rMCAO model. After that the skin of rat was sutured, the body temperature was maintained at  $37 \pm 0.5$  °C using a heating pad until the rat woke up. The rat was subjected to MR scanning after 24 h.

#### *Rat model of CRF*

The SD rats (~220-250 g) were administrated with nature saline suspension of adenine with the dose of 200 mg/kg every day through gastric gavage. The body weights were recorded every 7 days and the blood biochemical renal function indicators to evaluate the degree of renal impairment. The CRF rat models would be established after ~30 days of adenine administration.

#### **Blood half-life measurement**

NaGdF<sub>4</sub> nanoparticles or Gd-DTPA contrast agents with 0.1 mmol/kg Gd were intravenously injected into two groups of 6-week-old female BALB/c mice ( $n = 3$ ), respectively. The PEGylated NaGdF<sub>4</sub> nanoparticles. Blood samples were obtained and weighted at 30 s, 1 min, 5 min, 15 min, 30 min, 2 h, 4 h, 8 h, 12 h, 24 h and 48 h post-injection. The Gd content in the blood was determined through ICP-MS (Thermo, ICAP-Qc) after acid digestion.

#### **Histology study after MRI**

The tissues of brain were harvested after MRI experiments of AD mice and rMCAO rats, and were fixed in the paraformaldehyde. After being embedded into paraffin, the fixed tissues were sliced. Then the resultant slices were stained with H&E, and subjected to microscopy study for the histological analysis. For AD mice, the brain slice next to H&E slice were further stained with Thioflavin S, Congo red, Masson and Nissl through immunohistochemical method, for judging the blood hypoperfusion of AD. For rMCAO rats, the brain slice next to H&E slice were further stained with Nissl, Tunel and Masson through immunohistochemical method, for judging the arterial occlusion, collaterals, and ischemic penumbra.

#### **Biosafety evaluation of NaGdF<sub>4</sub> nanoparticles in healthy mice**

The randomly chosen female BALB/c mice (6-week-old) ( $n = 4$ ) was intravenously injected NaGdF<sub>4</sub> nanoparticles with 0.1 mmol/kg Gd and the other four healthy mice were the control group. The body weights of mice were recoded every day. At 14 d post-injection, the mice were sacrificed, and the major organs including heart, liver, spleen, lung and kidney were extracted and subjected to H&E staining and CPN III staining. A healthy mouse was set as the control. The blood collected from each mouse was further used for blood routine and blood chemical examinations.

#### **Biosafety evaluation of NaGdF<sub>4</sub> nanoparticles in healthy and CRF rats**

15 CRF rats were randomly divided into 3 groups ( $n = 5$ ). NaGdF<sub>4</sub> and Gd-DTPA with the dose of 0.1 mmol Gd per kg body weight were intravenously injected into the two groups of rats, respectively and the third group of rats were set as the control with no injection. Another 10 healthy rats (220 - 250 g) were randomly divided into 2 groups ( $n = 5$ ). NaGdF<sub>4</sub> at the dose of 0.1 mmol Gd per kg body weight was intravenously injected into the one group. The body weights of rats were recoded every day. The body weights of rats were recoded every day. The

blood samples were collected at pre- and 7, 14, 21, 28 d post-injection of contrast agents and subjected for renal and liver function related-blood indexes examinations. After 28 d injection, the rats were sacrificed, and the kidneys and livers of them were extracted, photographed, fixed with paraformaldehyde, cut into slices, and subjected to the H&E. In addition, the main organs including lung, spleen and heart from the representative rats in each group and skin tissues were extracted fixed with paraformaldehyde, cut into slices, and subjected to the H&E.

### **Biosafety evaluation of NaGdF<sub>4</sub> nanoparticles in swine**

Following the MRI, NaGdF<sub>4</sub> with the dose of 0.1 mmol Gd per kg body weight were intravenously injected into the young swine to be continually cultivated. In addition, another sexually matured swine (four-month male) was adopted with no injection. The rectal temperatures and body weights of the swine were recorded every day. The blood samples were collected from the front cavity vein of swine at 14 d post-injection of NaGdF<sub>4</sub> and subjected for blood routine and blood chemical examinations. After two-week injection, swines were sacrificed, and the major organs including heart, liver, spleen, lung, kidney, brain, and bladder were extracted, fixed with paraformaldehyde, cut into slices, and subjected to the H&E and CPN III staining.

### **Main parameters of MRI studies**

The main parameters of MRI studies in the current work were set as follows:

#### **1.5 T MRI:**

The detailed parameters for  $T_1$ -weighted imaging were set as follows: echo time (TE) = 12.58 ms; repetition time (TR) = 400 ms; number of excitations (NEX) = 6; Echo train length (ETL) = 10, Matrix (MTX) =  $360 \times 360$ . The detailed parameters for  $T_2$ -weighted imaging were set as follows: TE = 28 ms, TR = 1000 ms, NEX = 6, ETL = 10, MTX =  $360 \times 360$ .

$T_1$  relaxation time was obtained through 2D-Fast Gradient Recalled Echo sequence. The detailed parameters: TE = 8 ms, TR = 300, 500, 700, 900, 1100, 1300, 1500 ms, NEX = 1, ETL = 1, MTX =  $128 \times 128$ .  $T_2$  relaxation time was obtained through 2D-Fast Gradient Recalled Echo sequence. The detailed parameters: TE = 8, 12, 16, 20, 24, 28 ms, TR = 1000 ms, NEX = 1, ETL = 1, MTX =  $128 \times 128$ .

#### **7.0 T MRI:**

The detailed parameters for Chest and abdominal cavity 3D MR angiography of mice with mouse body coil were set as follows: TE = 1.400 ms, and TR = 11 ms, FOV =  $30 \text{ mm} \times 25 \text{ mm} \times 25 \text{ mm}$ , MTX =  $180 \times 150 \times 80$ , slice thickness = 25 mm.

The detailed parameters for 2D  $T_1$  MRI and SWI of liver and kidney of mice with mouse body coil were set as follows: TE = 7.1 ms, and TR = 455 ms, FOV =  $35 \text{ mm} \times 35 \text{ mm}$ , MTX =  $200 \times 200$ , slice thickness = 1 mm.

The detailed parameters for 3D MR angiography of AD mice with head coil were set as follows: TE = 1.49 ms, and TR = 11.451 ms, FOV =  $25 \text{ mm} \times 25 \text{ mm} \times 25 \text{ mm}$ , MTX =  $200 \times 200 \times 80$ , slice thickness = 25 mm.

The detailed parameters for 2D SWI of AD mice with head coil were set as follows: TE = 7 ms, and TR = 400 ms, FOV =  $25 \text{ mm} \times 25 \text{ mm}$ , MTX =  $180 \times 180$ , slice thickness = 1 mm.

The detailed parameters for 2D SWI of AD mice with surface coil were set as follows: TE = 8.071 ms, and TR = 400 ms, FOV = 20 mm × 18 mm, MTX = 174 × 157, slice thickness = 0.5 mm.

The detailed parameters for 2D TOF angiography of stroke rat with rat surface coil were set as follows: TE = 1.929 ms, and TR = 10 ms, FOV = 40 mm × 40 mm, MTX = 320 × 320, slice thickness = 0.5 mm.

The detailed parameters for 3D MR angiography of stroke rat with rat surface coil were set as follows: TE = 1.72 ms, and TR = 11.167 ms, FOV = 40 mm × 40 mm × 40 mm, MTX = 320 × 320 × 80, slice thickness = 40 mm.

The detailed parameters for 2D DWI and SWI of stroke rat with rat surface coil were set as follows: TE = 6.764 ms, and TR = 339 ms, FOV = 35 mm × 35 mm, MTX = 384 × 384, slice thickness = 1 mm.

### 3.0 T MRI:

The detailed parameters for 3D-TRICKS were set as follows: TE = Minimum, and TR = 3.3 ms, FOV = 320 mm × 288 mm, MTX = 256 × 224, slice thickness = 1.6 mm.

The detailed parameters for 3D BRAVO were set as follows: TE = 3 ms, and TR = 8 ms, FOV = 240 mm × 216 mm, MTX = 256 × 256, slice thickness = 1.0 mm.

The detailed parameters for SWAN were set as follows: TE=Minimum, TR=out of phase, FOV=240 × 192 mm, MTX=288 × 352, slice thickness =2.0 mm.

## Supplementary Figures

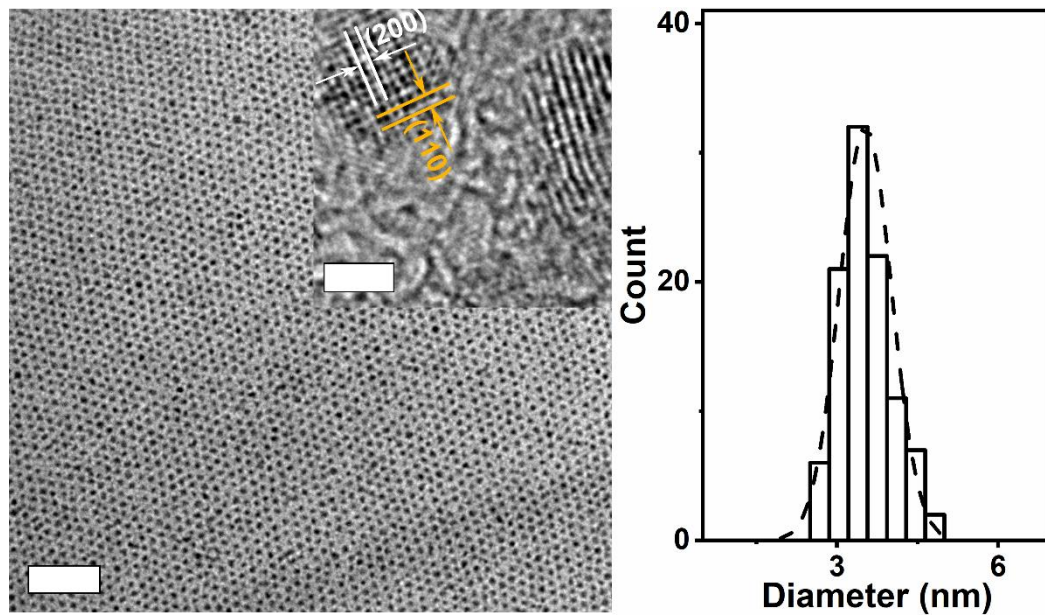

**Fig. S1.**

TEM images of oleate-capped NaGdF<sub>4</sub> nanoparticles together with the histogram profile (scale bar: 50 nm). Inset: the HRTEM image of oleate-capped NaGdF<sub>4</sub> nanoparticles (scale bar: 2 nm).

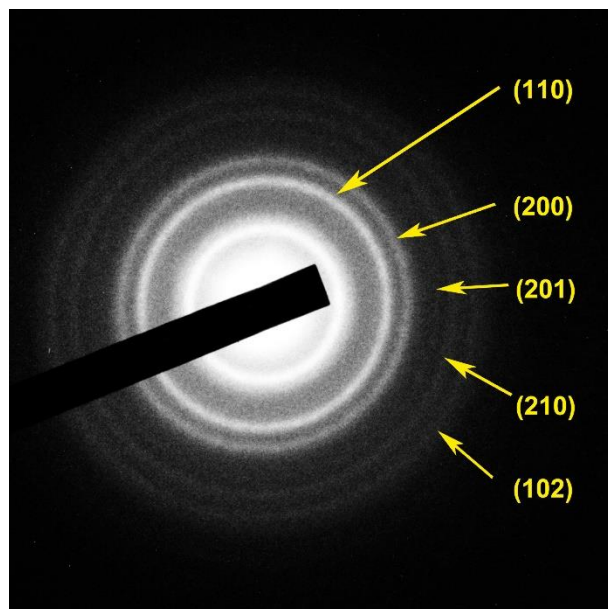

**Fig. S2.**

Selected area electron diffraction patterns of oleate-capped NaGdF<sub>4</sub> nanoparticles.

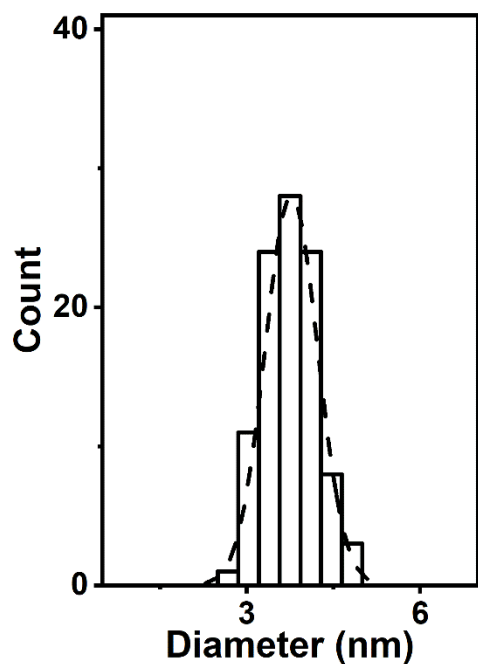

**Fig. S3.**

The histogram of the PEGylated NaGdF<sub>4</sub> nanoparticles size distribution profile summarized by TEM images.

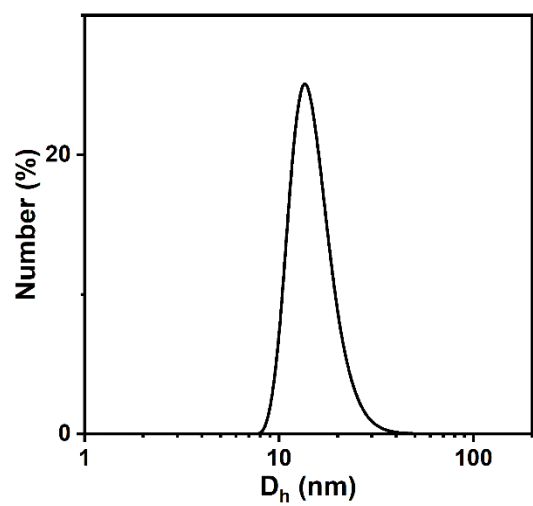

**Fig. S4.**

The DLS result of the PEGylated NaGdF<sub>4</sub> nanoparticles.



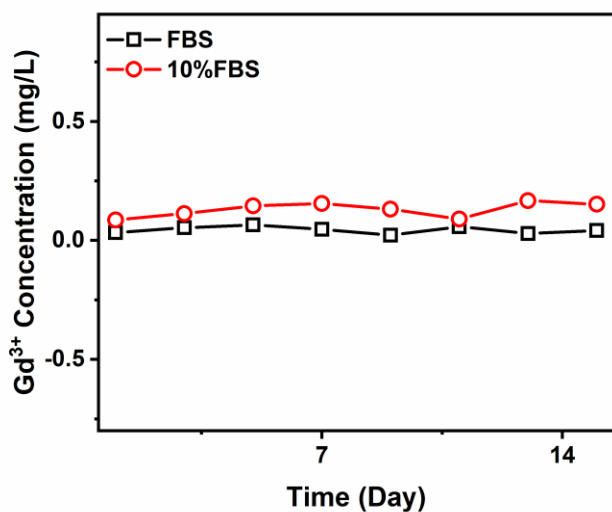

**Fig. S5.**

The 14-day monitoring of the potentially released Gd<sup>3+</sup> ions from the NaGdF<sub>4</sub> nanocrystal incubated in FBS and 10% FBS solutions.

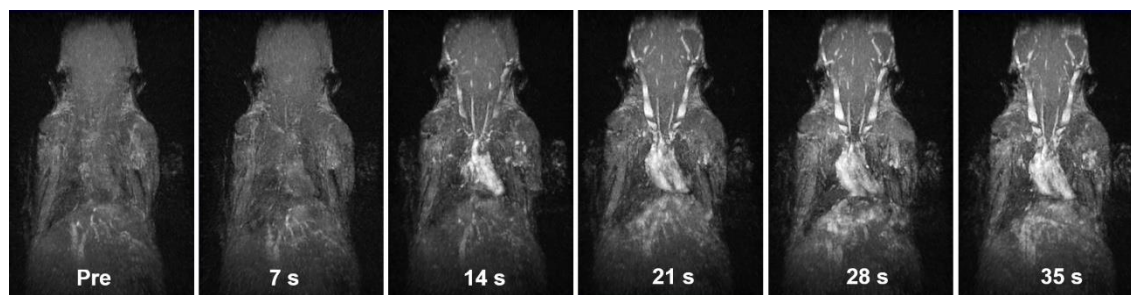

**Fig. S6.**

Real-time DCE MR angiography obtained pre- and post-injection of NaGdF<sub>4</sub> nanoparticles with 0.1 mmol/kg.

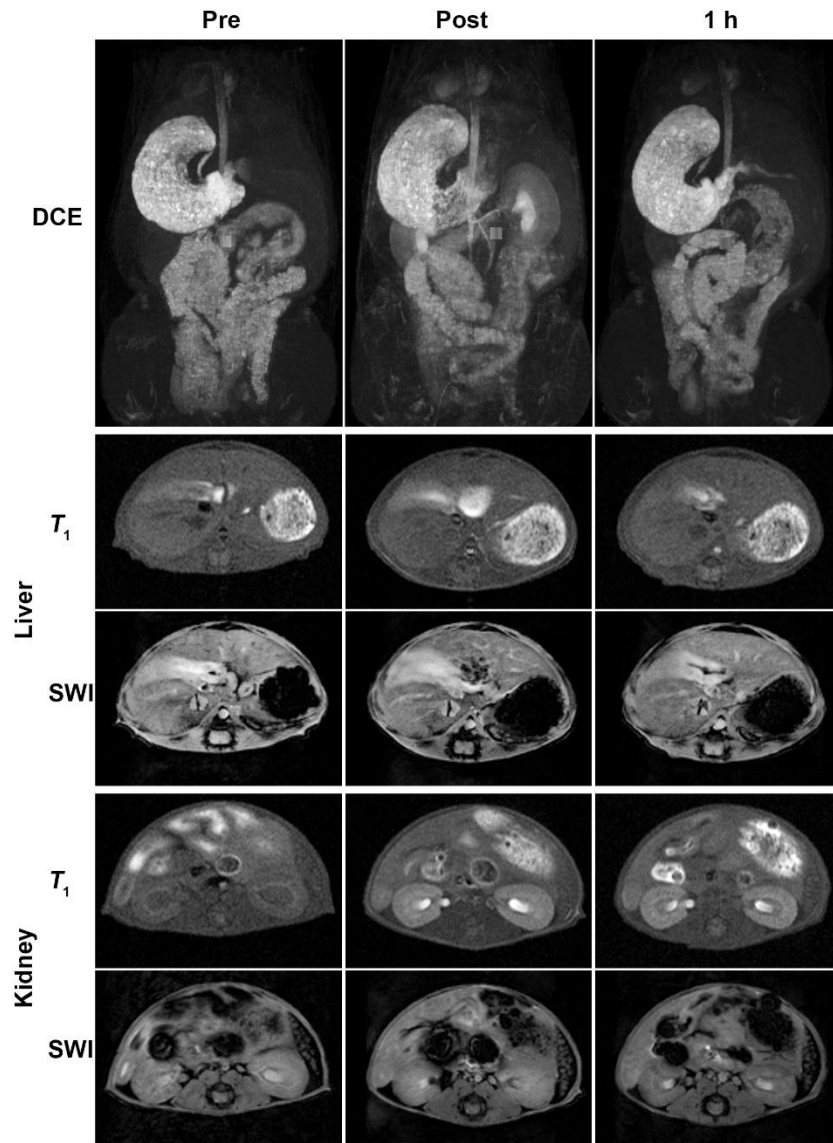

**Fig. S7.**

3D DCE-MRI,  $T_1$  MRI and SWI of liver and kidney of mice acquired before and at different time points after injection of Gd-DTPA.

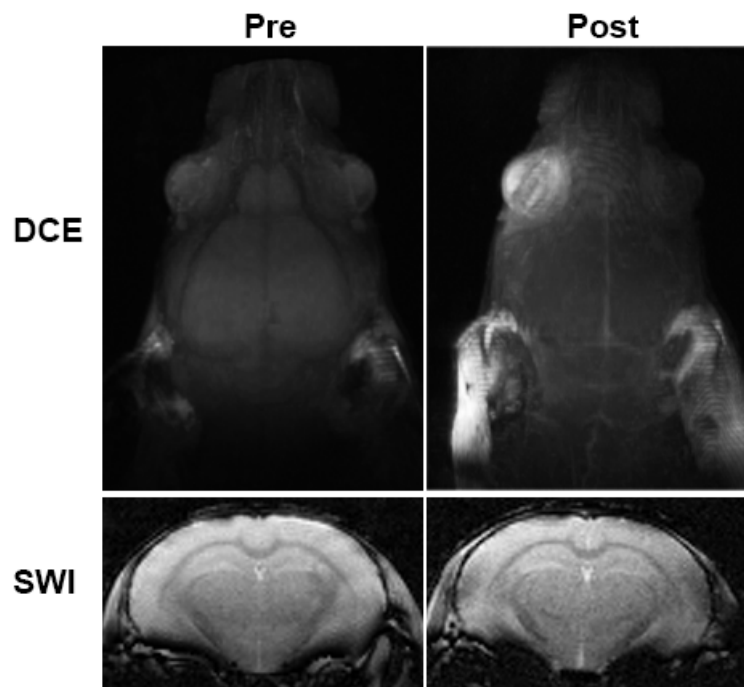

**Fig. S8.**  
3D DCE-MRI and SWI of the mouse brain acquired before and after injection of Gd-DTPA.

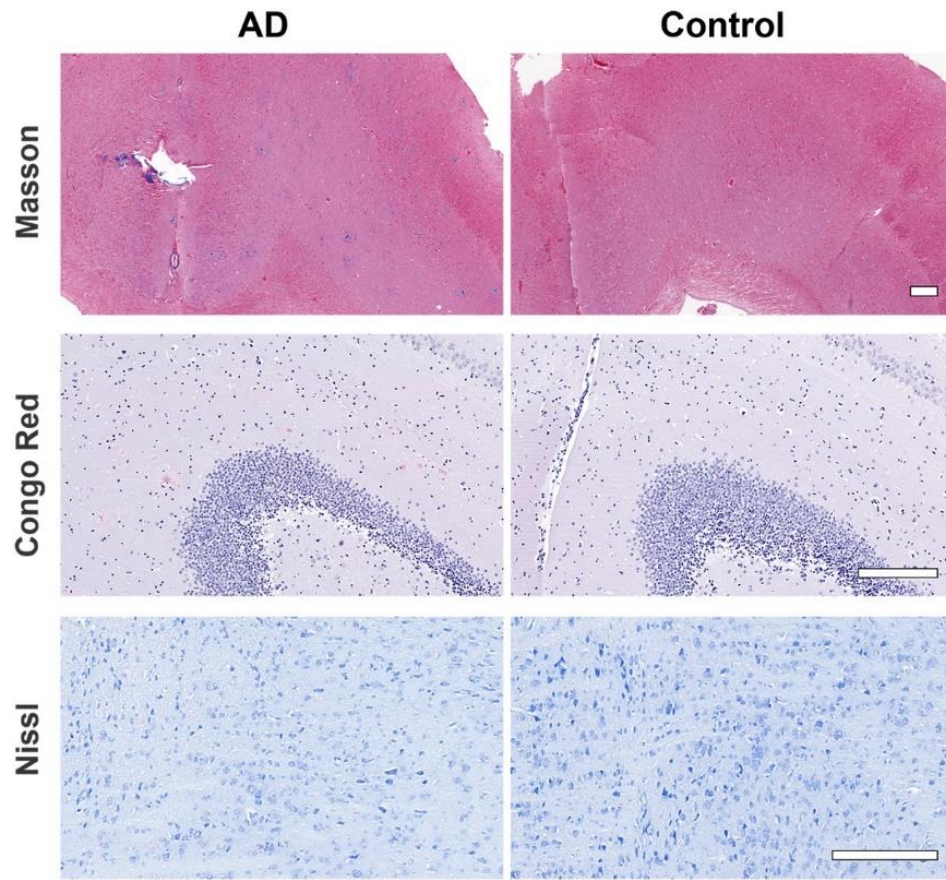

**Fig. S9.**

The enlarged Masson, Congo Red and Nissl staining images of the healthy and AD mouse brain. The embedded scale bar corresponded to 200  $\mu\text{m}$ .

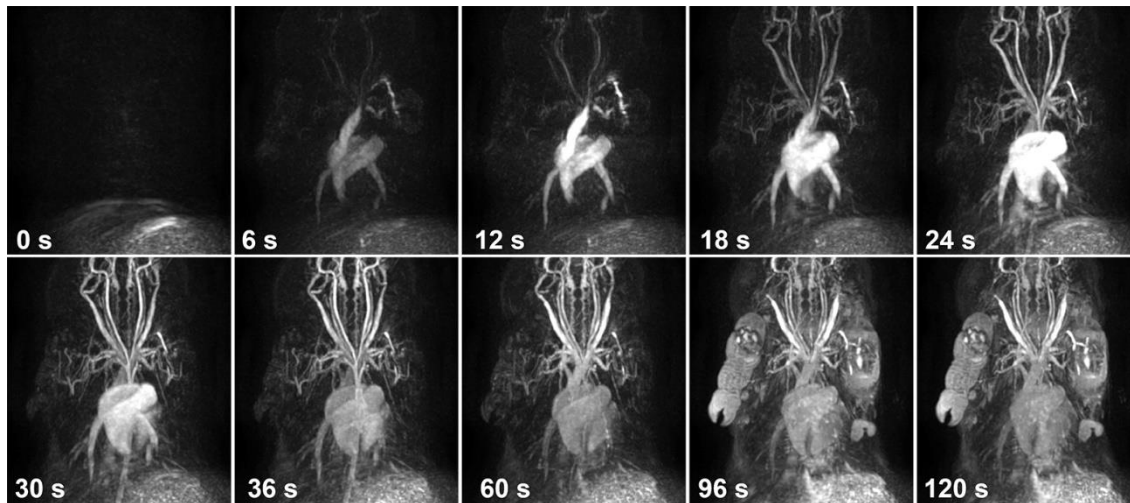

**Fig. S10.**

3D-TRICKS of swine during the first 120 s before and after injection of NaGdF<sub>4</sub> nanoparticles.

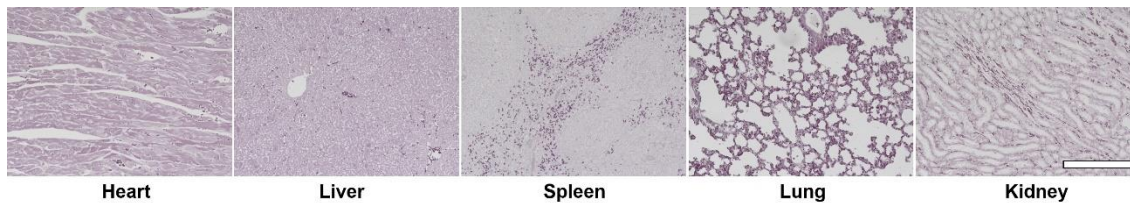

**Fig. S11.**

CPNIII staining of tissue slices of major organs from mice treated with NaGdF<sub>4</sub> nanoparticles. The embedded scale bar corresponded to 200  $\mu$ m.

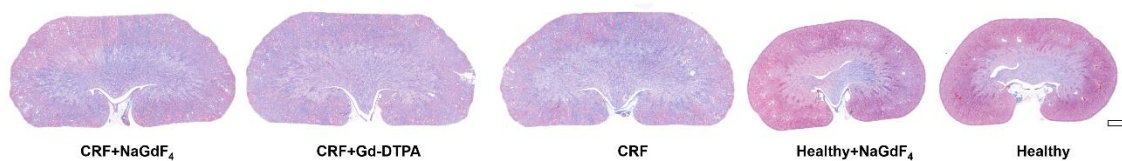

**Fig. S12.**

Masson staining of kidney of healthy mice and CRF treated with NaGdF<sub>4</sub> nanoparticles or not at 28 d post-injection. The embedded scale bar corresponded to 2 mm.

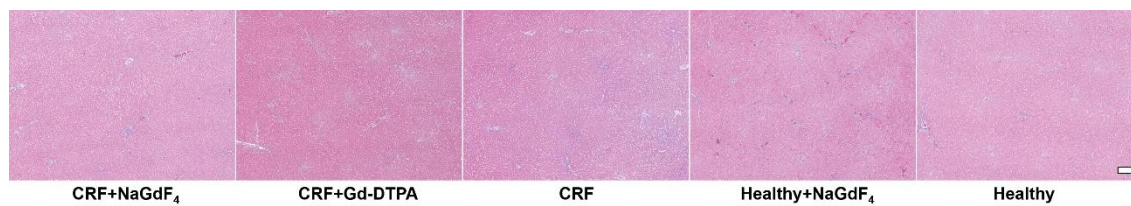

**Fig. S13.**

Masson staining of liver of healthy mice and CRF treated with NaGdF<sub>4</sub> nanoparticles or not at 28 d post-injection. The embedded scale bar corresponded to 200 μm.

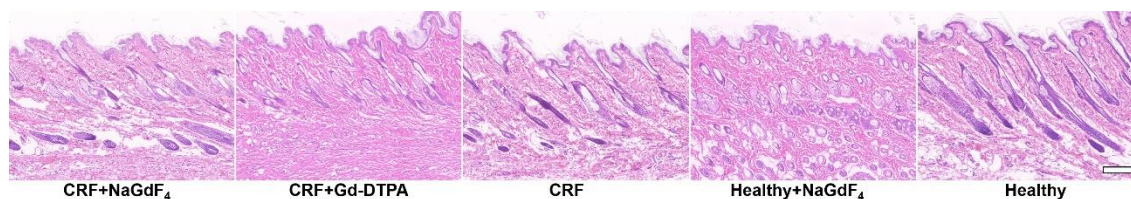

**Fig. S14.**

H&E staining of skin tissues from the representative rats in each group. The embedded scale bar corresponds to 200 μm.

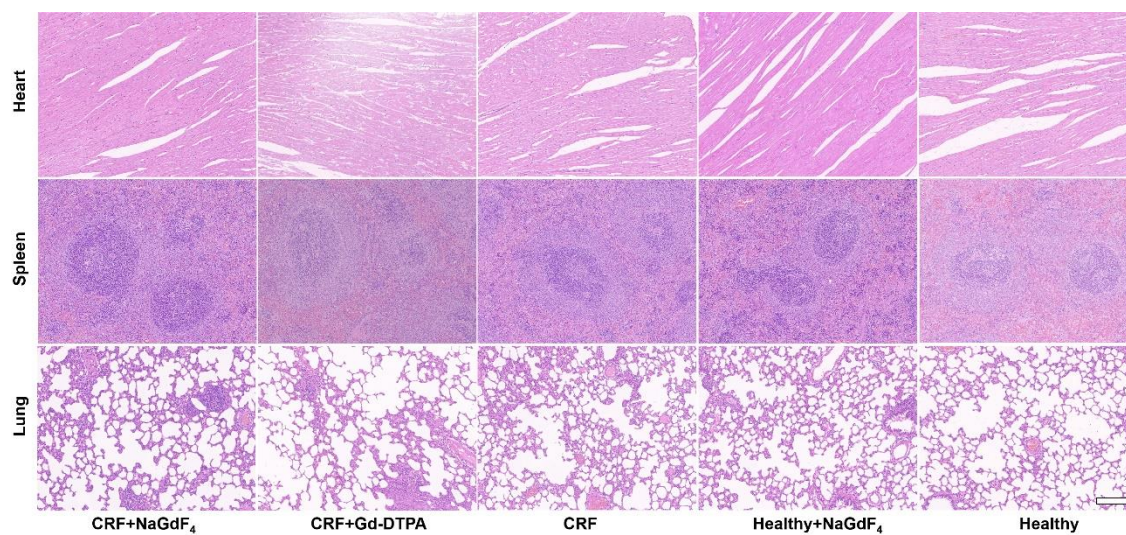

**Fig. S15.**

H&E staining of lung, spleen and heart from the representative rats in each group. The embedded scale bar corresponds to 200 μm.

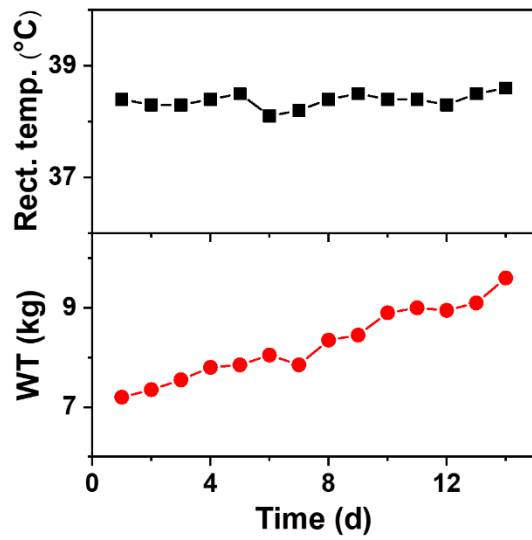

**Fig. S16.**

Fluctuations in the rectal temperature and the increase of body weight of young swine after NaGdF<sub>4</sub> nanoparticles administration.

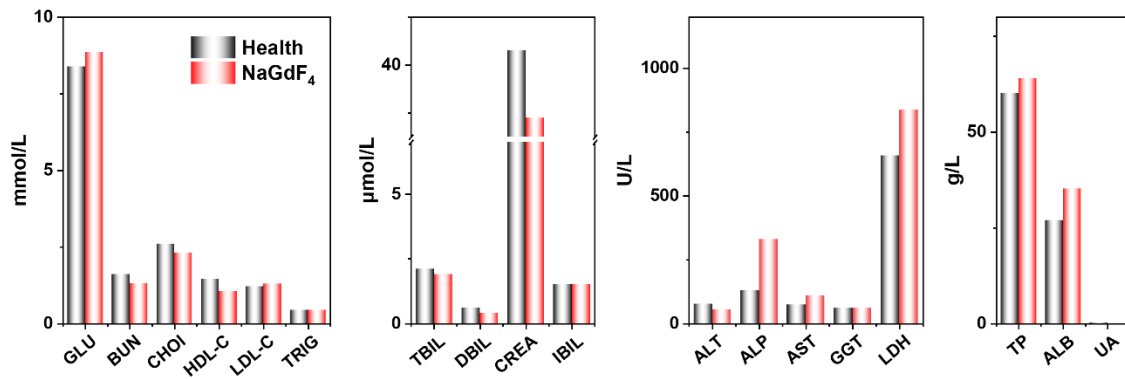

**Fig. S17.**

Blood biochemical test results of young swine treated with NaGdF<sub>4</sub> nanoparticles contrast agents.

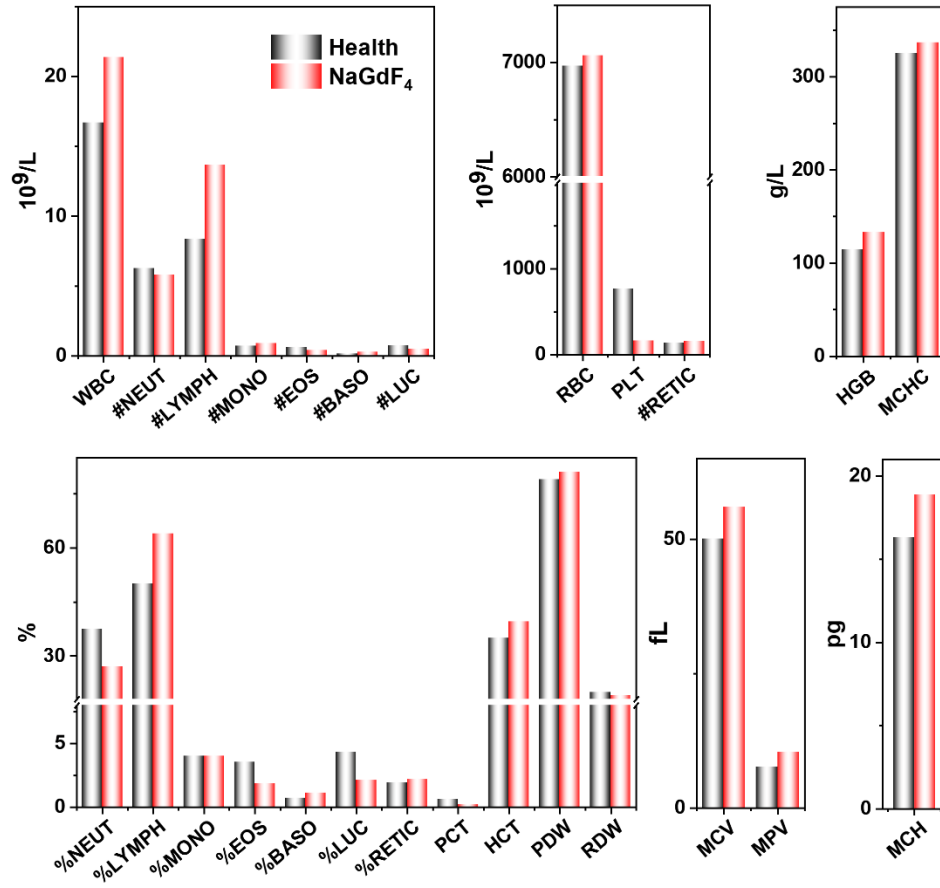

**Fig. S18.**

Routine blood test results of young swine treated with NaGdF<sub>4</sub> nanoparticles.



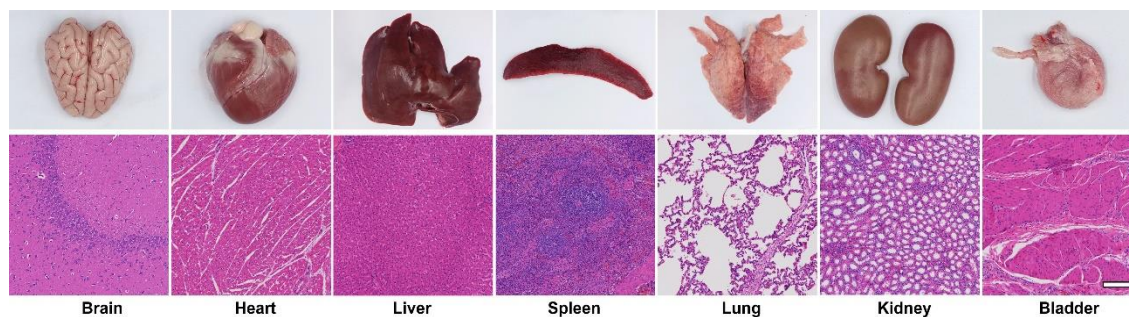

**Fig. S19.**

H&E staining of tissue slices from major organs of young swine treated with NaGdF<sub>4</sub> nanoparticles at 14 d post-injection. The embedded scale bar corresponded to 200 μm.

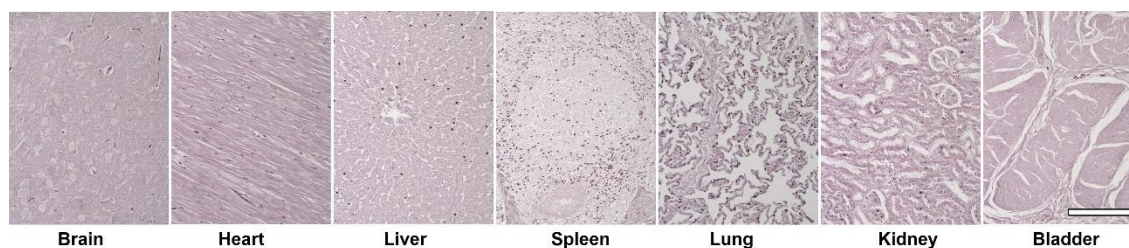

**Fig. S20.**

CPNIII staining of tissue slices of major organs from swine treated with NaGdF<sub>4</sub> nanoparticles. The embedded scale bar corresponded to 200 μm.

**Movie S1.**

3D MRI vascular structures of the health mouse from heart to kidney after intravenous injection of NaGdF<sub>4</sub>.

**Movie S2.**

3D MRI vascular structures of the health mouse from kidney to lower limbs after intravenous injection of NaGdF<sub>4</sub>.

**Movie S3.**

3D DCE MR angiography of the brain of the AD mouse after intravenous injection of NaGdF<sub>4</sub>.

**Movie S4.**

3D DCE MR angiography of the brain of the health mouse after intravenous injection of NaGdF<sub>4</sub>.

**Movie S5.**

Axial TOF angiography show of the rat head.

**Movie S6.**

3D DCE MR angiography of the stroke rat head before intravenous injection of NaGdF<sub>4</sub>.

**Movie S7.**

3D DCE MR angiography of the stroke rat head after intravenous injection of NaGdF<sub>4</sub>.

**Movie S8.**

The spatial evolution of blood vessels of swine derived from 3D BRAVO imaging (slice by slice) after intravenous injection of NaGdF<sub>4</sub>.

**Movie S9.**

The spatial evolution of blood vessels of swine derived from 3D BRAVO imaging (slice by slice) after intravenous injection of Gd-DTPA.
